# Supplementary material for: Rotational motion of a single water molecule in a buckyball
Source: Royal Society of Chemistry journal article supplement (doi:10.1039/c3cp53277a), 2013-01-01
Supplement: c3cp53277a.pdf [file c3cp53277a.pdf]

# Supplementary Information

---

## Rotational Motion of a Single Water Molecule in Bucky ball

S.1-Scaling factor for M06-2X/6-311G(2d,p) frequencies

S.2-Description of water orientation in DFT

S.3-Frequency calculation in MD

S.4-Gas-phase O-H bond vibrational frequencies of water

S.5-Water angle and bond lengths

S.6-Rotational diffusion and entropy

## **S.1-Scaling factor for M06-2X/6-311G(2d,p) frequencies**

DFT calculations can be used to compute internal vibrational frequencies of molecules assuming that the potential energy close to the minimum varies quadratically with respect to the position of the nuclei. Since the anharmonicity of the potential is neglected, this leads to an over-estimate of the vibrational frequencies<sup>1</sup>. Hence, the computed frequencies are usually scaled by a factor calibrated using the F38/10 database<sup>1</sup>. The scaling factor is optimized by minimizing the root mean-squared deviation between the frequencies computed by the DFT method and by experimental measurements. The frequencies are summarized in Table S.1.1.

Table S.1.1. Experimental and DFT frequencies for F38/10 database

| Molecule | mode | Frequency ( $cm^{-1}$ ) |                               |                                  |
|----------|------|-------------------------|-------------------------------|----------------------------------|
|          |      | Experiments*            | M06-2X/6-311G(2d,p)           |                                  |
|          |      |                         | With anharmonicity correction | Without anharmonicity correction |
| HF       | 1    | 3959                    | 3980                          | 4216                             |
| H2       | 1    | 4159                    | 4224                          | 4474                             |
| N2       | 1    | 2330                    | 2367                          | 2507                             |
| F2       | 1    | 894                     | 1088                          | 1153                             |
| CO       | 1    | 2143                    | 2146                          | 2273                             |
| OH       | 1    | 3568                    | 3554                          | 3765                             |
| Cl2      | 1    | 554                     | 544                           | 576                              |
| CO2      | 1    | 1333                    | 1330                          | 1409                             |
|          | 2    | 2349                    | 2326                          | 2463                             |
|          | 3    | 667                     | 659                           | 698                              |
| H2O      | 1    | 3657                    | 3669                          | 3886                             |
|          | 2    | 1595                    | 1556                          | 1648                             |
|          | 3    | 3756                    | 3761                          | 3984                             |
| N2O      | 1    | 2224                    | 2275                          | 2409                             |
|          | 2    | 1285                    | 1281                          | 1357                             |
|          | 3    | 589                     | 617                           | 653                              |
| HCN      | 1    | 3312                    | 3267                          | 3461                             |
|          | 2    | 2089                    | 2123                          | 2249                             |
|          | 3    | 712                     | 740                           | 784                              |
| C2H2     | 1    | 3374                    | 3334                          | 3531                             |
|          | 2    | 1974                    | 1995                          | 2113                             |
|          | 3    | 3289                    | 3231                          | 3423                             |
|          | 4    | 612                     | 654                           | 693                              |
|          | 5    | 730                     | 743                           | 787                              |
| H2CO     | 1    | 2782                    | 2811                          | 2978                             |
|          | 2    | 1746                    | 1779                          | 1885                             |
|          | 3    | 1500                    | 1465                          | 1552                             |
|          | 4    | 1167                    | 1148                          | 1215                             |
|          | 5    | 2843                    | 2854                          | 3023                             |
|          | 6    | 1249                    | 1213                          | 1285                             |
| NH3      | 1    | 3337                    | 3306                          | 3502                             |
|          | 2    | 950                     | 1045                          | 1107                             |
|          | 3    | 3444                    | 3418                          | 3620                             |
|          | 4    | 1627                    | 1592                          | 1686                             |
| CH4      | 1    | 2917                    | 2886                          | 3057                             |
|          | 2    | 1534                    | 1481                          | 1569                             |
|          | 3    | 3019                    | 2996                          | 3174                             |
|          | 4    | 1306                    | 1269                          | 1344                             |

\* Experimental data are originally summarized in Table 1 of Alecu *et al.*<sup>1</sup>

## S.2-Description of water orientation in DFT

Water orientation is described using one arbitrarily chosen hexagonal ring of C<sub>60</sub> as the reference plane.  $\alpha$  is the angle formed between the C<sub>6</sub> axis of the hexagonal ring of C<sub>60</sub> (as indicated by orange dash line) and one O-H bond of water molecule.  $\psi$  represents the rotation of the water plane along the O-H bond.

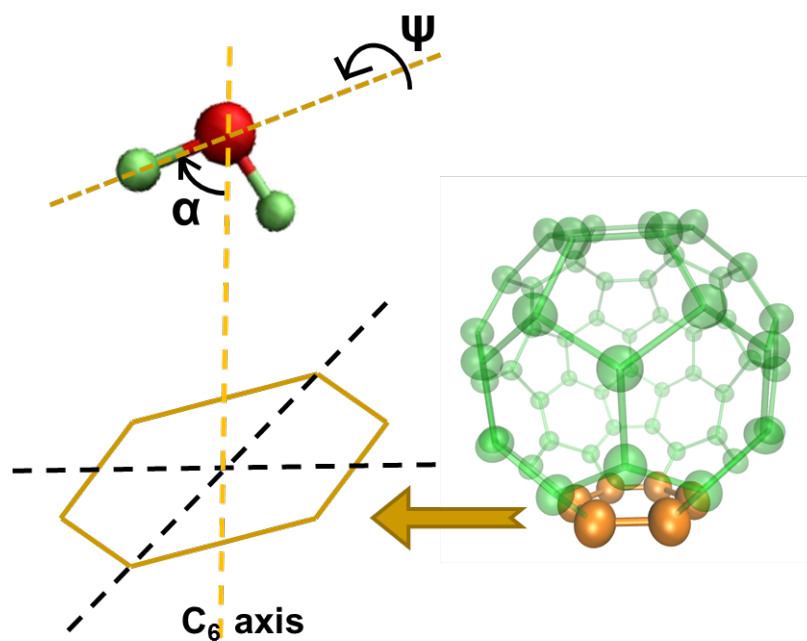

Figure S.2.1. The description of water orientation using one arbitrarily chosen hexagonal ring of C<sub>60</sub> as the reference.

### S.3- Frequency calculation in MD

The trajectories of the hydrogen atoms of the water molecule are collected during MD simulations. The velocity autocorrelation of the hydrogen atoms,  $C_H(t)$  is computed by:

$$C_H(t) = \frac{\langle v_H(t)v_H(0) \rangle}{\langle v_H^2(0) \rangle}$$

where  $v_H(0)$  and  $v_H(t)$  are the velocity of hydrogen atoms at time 0 and at time  $t$ .  $\langle \rangle$  denotes average over 200 runs with different initial velocity. For each run, the system is equilibrated for 500ps and then the simulation is run for 200ps for data production. The coordinates of the atoms are stored every 1fs. Fourier transformation of the velocity autocorrelation  $C_H(t)$  gives the power spectra density,  $S(\omega)$ ,

$$S(\omega) = \int_0^\infty dt C_H(t) \cos \omega t$$

The vibrational frequencies correspond to the peak positions in the power spectra density<sup>2</sup>.

Since finite temperature tends to spread the peaks in the spectra, MD simulations are done at a temperature of 10 K.

## S.4 Gas-phase vibrational frequencies of water

The accuracy of the water model is tested by comparing it to the experimental gas-phase vibrational frequency<sup>3</sup>. The vibrational frequencies predicted by Ferguson water model<sup>4</sup> compare well with experimental data. The frequencies obtained using the SPC/E, SPC, and TIP3P flexible water models<sup>5</sup> deviate from experimental data. The frequencies of stretching mode predicted by density functional theory calculation with M06-2X functional also agree well with experiments.

Table S.4.1. The gas-phase vibrational frequencies of water.

|                         | Experiment | DFT  | Ferguson | SPC/E | TIP3P | SPC  |
|-------------------------|------------|------|----------|-------|-------|------|
| Asymmetrical stretching | 3755       | 3761 | 3725     | 3234  | 3901  | 3234 |
| Symmetrical stretching  | 3656       | 3669 | 3651     | 3171  | 3831  | 3171 |
| Bending                 | 1594       | 1556 | 1588     | 1522  | 2105  | 1522 |

## S.5-Water angle and bond lengths

We have computed the bond length vibration (stretching of O...H bond), the variation of hydrogen – hydrogen distance, and water (H---O---H) angle. The positions of atoms were stored and the position changes and angles were tracked. Figures S.5.1-S.5.3 show the range of bond lengths and angles.

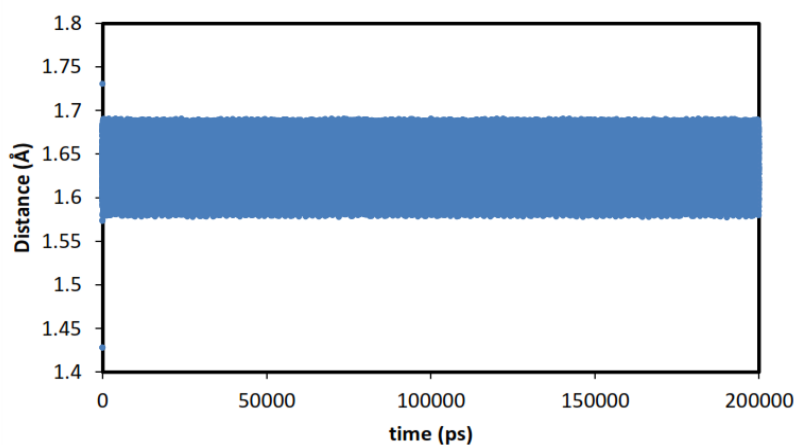

Figures S.5.1. H...H distance versus time (range 1.58-1.68 Å), Average= 1.6352 Å.

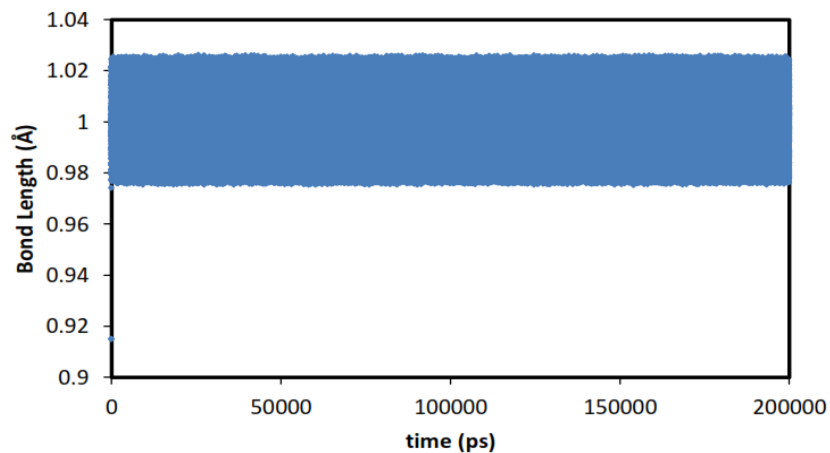

Figures S.5.2. O...H bond stretching versus time (range 0.977-1.02 Å), Average= 1.0002 Å.

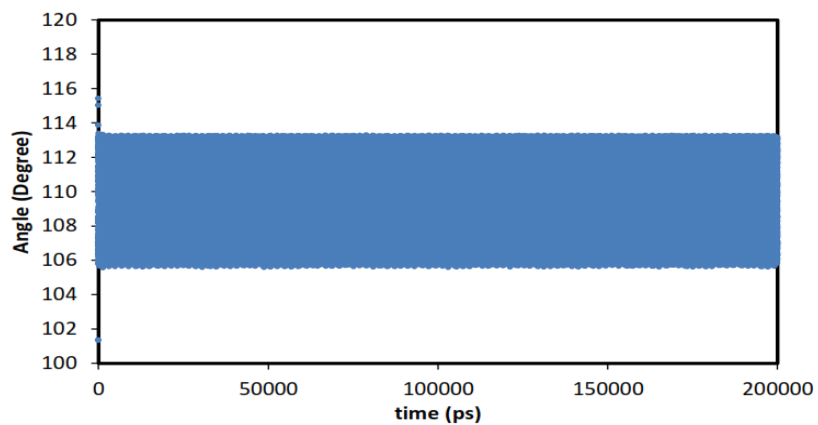

Figures S.5.3.  $\angle$ HOH distribution versus time (range  $105.91^\circ$ - $113.75^\circ$ ), Average=  $109.64^\circ$ .



## S.6. Rotational diffusion and entropy

### S.6.1. Rotational diffusion

We have computed the rotational mean squared displacement (RMSD) of bulk water and a single water molecule in C60. The total rotational angular displacement,  $[\phi_i(t) - \phi_i(0)]$ , is described by the following equation:

$$\phi_i(t) - \phi_i(0) = \sum_{n=0}^{k-1} \delta\phi_i(n\delta t, \delta t) \quad (\text{S.6.1})$$

where  $k=t/\delta t$  ( $t$  is the whole simulation time, and  $\delta t$  is the time step). We used the dipole vector  $\mathbf{p}_i(t)$ , which is fixed to the water molecule at each time instance.  $|\delta\phi_i(t, \delta t)|$ , is computed by using the cross product of  $\mathbf{p}_i(t)$  and  $\mathbf{p}_i(t + \delta t)$ :

$$|\delta\phi_i(t, \delta t)| = \cos^{-1}[\mathbf{p}_i(t) \cdot \mathbf{p}_i(t + \delta t)] \quad (\text{S.6.2})$$

The rotational mean squared angular displacement is calculated (averaged over all molecules for the case of bulk water) based on equation S.6.3. To have the best resolution for computation of RMSD, the time interval is taken to be  $\delta t = 0.5$  fs. The RMSD is given by<sup>6</sup>:

$$\langle \Delta\phi^2(t) \rangle = \frac{1}{N} \sum_i \langle |\phi_i(t) - \phi_i(0)|^2 \rangle \quad (\text{S.6.3})$$

where  $\langle \rangle$  denotes the averaging over time. The rotational diffusion coefficient can be computed for the limit of long time as given by:

$$D_{rot} = \lim_{t \rightarrow \infty} \frac{1}{4t} \langle \Delta\phi^2(t) \rangle \quad (\text{S.6.4})$$

By plotting RMSD versus time, the best linear fit to the RMSD curve is found and the slope of this fit represents the rotational diffusion.

## S.6.2. Rotational entropy

The configuration (rotational) entropy can be estimated using the Boltzmann entropy law. By knowing the angular distribution of dipole in  $\theta$  and  $\varphi$  directions (see Fig.S.6.1), it is possible to estimate the rotational entropy by integrating the Boltzmann entropy law over all angular distributions of the dipole. The rotational entropy<sup>7</sup> can be estimated using the equation:

$$S_{rot} = -k_B \int \int (p(\varphi) \log(p(\varphi)) \cdot (p(\theta) \log(p(\theta)))) d\varphi d\theta \quad (\text{S.6.5})$$

The angles  $\theta$  and  $\varphi$ , are the water molecule's angles in spherical coordinates (Fig.S.6.1),  $p(\theta)$  (PDF of the angle distribution in  $\theta$ ), and  $p(\varphi)$  (PDF of the angle distribution in  $\varphi$ ). For water in C60, these two PDFs are estimated and the rotational entropy is computed based on Equation S.6.5. For bulk water, the average angular distribution of water molecules in  $\theta$  and  $\varphi$  are considered.

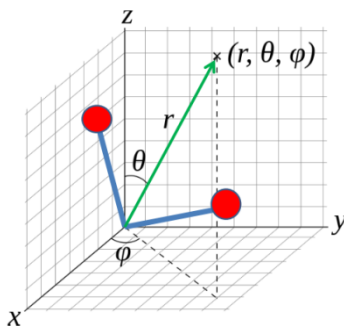

Fig.S.6.1. Demonstration of water molecule's angles in spherical coordinate ( $\varphi$ ,  $\theta$ )

## References

1. Alecu, I. M.; Zheng, J.; Zhao, Y.; Truhlar, D. G., Computational Thermochemistry: Scale Factor Databases and Scale Factors for Vibrational Frequencies Obtained from Electronic Model Chemistries. *Journal of Chemical Theory and Computation* **2010**, *6* (9), 2872-2887.
2. Gordillo, M. C.; Marti, J., Molecular dynamics description of a layer of water molecules on a hydrophobic surface. *Journal of Chemical Physics* **2002**, *117* (7), 3425-3430.
3. Chen, S. H.; Toukan, K.; Loong, C. K.; Price, D. L.; Teixeira, J., HYDROGEN-BOND SPECTROSCOPY OF WATER BY NEUTRON-SCATTERING. *Physical Review Letters* **1984**, *53* (14), 1360-1363.
4. Ferguson, D. M., PARAMETERIZATION AND EVALUATION OF A FLEXIBLE WATER MODEL. *Journal of Computational Chemistry* **1995**, *16* (4), 501-511.
5. Lindahl, E.; Hess, B.; van der Spoel, D., GROMACS 3.0: a package for molecular simulation and trajectory analysis. *Journal of Molecular Modeling* **2001**, *7* (8), 306-317.
6. Debnath, A.; Mukherjee, B.; Ayappa, K. G.; Maiti, P. K.; Lin, S.-T., Entropy and dynamics of water in hydration layers of a bilayer. *Journal of Chemical Physics* **2010**, *133* (17).
7. Polyansky, A. A.; Zubac, R.; Zagrovic, B., Estimation of Conformational Entropy in Protein-Ligand Interactions: A Computational Perspective. In *Computational Drug Discovery and Design*, Baron, R., Ed. 2012; Vol. 819, pp 327-353.
